# Supplementary material for: Construction and validation of somatic mutation-derived LncRNA signatures of genomic instability to predict prognosis of hepatocellular carcinoma
Source: Research Square preprint supplement (doi:10.21203/rs.3.rs-3092494/v1), 2023-06-28
Supplement: Supplementary file 1 [file 2c909481ec8b7a63cdf7390a.docx]

**Table**

*Table 1* Univariate and multivariate Cox regression analysis were performed for the risk score models which based on GILncSig and the overall survival of each patient group.
